# Supplementary material
Source: PubMed Central journal article supplement (PMC6233115)
Supplement: pnas.1810979115.sapp.pdf [file pnas.1810979115.sapp.pdf]

## Supplementary material for:

# Intersexual conflict over seed size is stronger in more outcrossed populations of a mixed mating plant

**Astrid Raunsgard<sup>1</sup>, Øystein H. Opedal<sup>1</sup>, Runa K. Ekrem<sup>1</sup>, Jonathan Wright<sup>1</sup>, Geir H. Bolstad<sup>2</sup>, W. Scott Armbruster<sup>3,4</sup>, Christophe Pélabon<sup>1</sup>**

<sup>1</sup> Centre for Biodiversity Dynamics, Department of Biology, Norwegian University of Science and Technology, NTNU, 7491 Trondheim, Norway.

<sup>2</sup> Norwegian Institute for Nature Research, 7485 Trondheim, Norway.

<sup>3</sup> School of Biological Sciences, King Henry Building, King Henry I Street, University of Portsmouth, Portsmouth PO1 2DY, UK.

<sup>4</sup> Institute of Arctic Biology, University of Alaska, Fairbanks, AK 99775, USA.

**Table S1.** Coordinates, average herkogamy measured by the anther-stigma distance (ASD) and average seed diameter of the nine populations of *Dalechampia scandens* included in the first data set.

| <b>Population</b>        | <b>Coordinates</b>       | <b>ASD <math>\pm</math> SE (mm)</b> | <b>Seed dia <math>\pm</math> SE (mm)</b> |
|--------------------------|--------------------------|-------------------------------------|------------------------------------------|
| Bacalar (BA)             | 18°36'40" N, 88°26'32" W | 3.01 $\pm$ 0.31                     | 4.01 $\pm$ 0.027                         |
| Comalcalco (C)           | 18°21'26" N, 93°20'43" W | 2.61 $\pm$ 0.28                     | 3.89 $\pm$ 0.023                         |
| Cacalchén (CA)           | 20°58'01" N, 89°13'18" W | 1.79 $\pm$ 0.17                     | 4.02 $\pm$ 0.031                         |
| Ciudad del Carmen (CC)   | 18°56'29" N, 91°18'01" W | 3.40 $\pm$ 0.16                     | 4.15 $\pm$ 0.043                         |
| Graciano Sánchez (GS)    | 19°08'04" N, 88°30'18" W | 2.68 $\pm$ 0.23                     | 4.23 $\pm$ 0.022                         |
| La Mancha (LM)           | 19°37'15" N, 96°28'09" W | 0.33 $\pm$ 0.15                     | 3.87 $\pm$ 0.009                         |
| Martinez de la Torre (M) | 20°05'09" N, 97°01'55" W | 2.95 $\pm$ 0.27                     | 4.14 $\pm$ 0.031                         |
| Puerto Morelos (PM)      | 20°51'11" N, 86°53'43" W | 2.62 $\pm$ 0.19                     | 4.30 $\pm$ 0.035                         |
| Tulum (T)                | 20°12'26" N, 87°27'04" W | 3.34 $\pm$ 0.18                     | 4.22 $\pm$ 0.018                         |

**Table S2.** Number of seeds and (number of crosses) in crosses among the nine populations of *Dalechampia scandens* included in the first data set. Between-populations crosses:  $n = 635$  seeds (86 crosses). Within-population crosses (on the diagonal):  $n = 1427$  seeds (176 crosses).

|     | ♂BA    | ♂C      | ♂CA     | ♂CC      | ♂GS     | ♂LM      | ♂M      | ♂PM      | ♂T      |
|-----|--------|---------|---------|----------|---------|----------|---------|----------|---------|
| ♀BA | 68 (8) | 26 (4)  | 82 (11) | 20 (3)   | 5 (1)   | 15 (2)   | 25 (3)  | 5 (1)    | 12 (2)  |
| ♀C  | 9 (2)  | 88 (11) | -       | -        | 8 (1)   | -        | 4 (1)   | -        | 4 (1)   |
| ♀CA | 39 (5) | -       | 80 (9)  | -        | -       | -        | -       | -        | -       |
| ♀CC | 5 (1)  | 17 (2)  | 9 (1)   | 328 (40) | 5 (1)   | -        | 6 (1)   | 9 (1)    | 23 (3)  |
| ♀GS | -      | -       | -       | 8 (1)    | 87 (10) | -        | 7 (1)   | -        | -       |
| ♀LM | -      | 7 (1)   | 7 (1)   | 24 (3)   | 9 (1)   | 408 (50) | 37 (5)  | -        | 31 (4)  |
| ♀M  | 15 (2) | 4 (1)   | 22 (3)  | 30 (4)   | 8 (1)   | 37 (5)   | 86 (10) | 6 (1)    | 15 (2)  |
| ♀PM | -      | -       | -       | 9 (1)    | -       | -        | -       | 196 (28) | -       |
| ♀T  | -      | 8 (1)   | 9 (1)   | -        | 6 (1)   | -        | -       | 8 (1)    | 86 (10) |

**Table S3.** Coordinates, average herkogamy measured as the anther-stigma distance (ASD) and average seed diameter of the four study populations of *D. scandens* used for the diallel crosses.

| <b>Population</b>        | <b>Coordinates</b>       | <b>ASD <math>\pm</math> SE<br/>(mm)</b> | <b>Seed dia <math>\pm</math> SE<br/>(mm)</b> |
|--------------------------|--------------------------|-----------------------------------------|----------------------------------------------|
| Comalcalco (C)           | 18°21'26" N, 93°20'43" W | 2.61 $\pm$ 0.28                         | 3.89 $\pm$ 0.023                             |
| Puerto Morelos (PM)      | 20°51'11" N, 86°53'43" W | 2.62 $\pm$ 0.19                         | 4.30 $\pm$ 0.035                             |
| Martinez de la Torre (M) | 20°05'09" N, 97°01'55" W | 2.95 $\pm$ 0.27                         | 4.14 $\pm$ 0.031                             |
| Ciudad del Carmen (CC)   | 18°56'29" N, 91°18'01" W | 3.40 $\pm$ 0.16                         | 4.15 $\pm$ 0.043                             |

**Table S4.** Number of seeds and (number of crosses) in the 16 cross-combinations within and between the four populations of *D. scandens* (♀: maternal population, ♂: paternal population) used for the diallel crosses. On the diagonal (within-population crosses), the first set of numbers correspond to self-crosses, the second set corresponds to outcrosses.

|     | ♂C               | ♂CC              | ♂M               | ♂PM             |
|-----|------------------|------------------|------------------|-----------------|
| ♀C  | 80 (11)/199 (15) | 248 (29)         | 220 (28)         | 244 (30)        |
| ♀CC | 230 (28)         | 82 (10)/174 (20) | 255 (30)         | 258 (30)        |
| ♀M  | 232 (26)         | 234 (28)         | 88 (10)/180 (21) | 261 (30)        |
| ♀PM | 216 (28)         | 235 (29)         | 216 (27)         | 73 (9)/169 (21) |

**Table S5.** Results of the statistical test of the tug-of-war hypothesis in the two datasets (crosses among nine populations and diallel among four population). The support for the tug-of-war hypothesis is given by the effect of the relative outcrossing rate [ $\log_e(\text{paternal population herkogamy}/\text{maternal population herkogamy})$ ] on the hybrid relative seed size, that is, the hybrid seed diameter expressed as a percentage of the average seed diameter within the maternal population (see Table S1 and S8 for maternal averages). For both datasets, the mixed effect models include the random factors blossom identity nested within maternal plant identity, itself nested within maternal population identity, and paternal plant identity nested within paternal population identity. For the diallel data, the covariates included in the model, peduncle diameter (mm) and seed set (number of seeds per blossom), were centred on the mean of the maternal population. The units of the estimates are % for the intercept, and % change per unit change in the explanatory variables for the other estimates.

| <b>Model</b>                | <b>Parameter</b>            | <b>Estimate <math>\pm</math> SE</b> | <b><i>T</i></b> | <b><i>P</i></b> |
|-----------------------------|-----------------------------|-------------------------------------|-----------------|-----------------|
| 9 pops                      | Intercept                   | 99.9 $\pm$ 0.61                     | 163.1           | <0.001          |
|                             | Relative outcrossing rate   | 1.34 $\pm$ 0.46                     | 2.91            | <0.001          |
| 4 pops                      | Intercept                   | 100 $\pm$ 0.29                      | 344.7           | <0.001          |
|                             | Relative outcrossing rate   | 3.28 $\pm$ 1.193                    | 2.75            | <0.01           |
|                             | Peduncle                    | 3.142 $\pm$ 2.447                   | 1.28            | 0.20            |
|                             | Seed set                    | 0.509 $\pm$ 0.350                   | 1.46            | 0.15            |
|                             | Peduncle $\times$ matpop CC | 5.155 $\pm$ 3.186                   | 1.62            | 0.11            |
|                             | Peduncle $\times$ matpop M  | 3.805 $\pm$ 2.970                   | 1.28            | 0.20            |
|                             | Peduncle $\times$ matpop PM | - 5.776 $\pm$ 3.014                 | - 1.92          | 0.056           |
|                             | Seed set $\times$ matpop CC | - 0.733 $\pm$ 0.363                 | - 2.02          | 0.044           |
|                             | Seed set $\times$ matpop M  | 0.155 $\pm$ 0.416                   | 0.37            | 0.71            |
|                             | Seed set $\times$ matpop PM | - 0.579 $\pm$ 0.323                 | - 1.80          | 0.074           |
|                             | Seed set $\times$ patpop CC | - 0.466 $\pm$ 0.323                 | - 1.44          | 0.15            |
|                             | Seed set $\times$ patpop M  | 0.141 $\pm$ 0.296                   | 0.48            | 0.64            |
| Seed set $\times$ patpop PM | - 0.298 $\pm$ 0.295         | - 0.76                              | 0.45            |                 |

**Table S6a.** Results of the first statistical test for the recognition-avoidance hypothesis in the two datasets (crosses among nine populations and diallel among four populations). Support for the recognition-avoidance hypothesis is given by the effect of cross type (within- and between populations) on hybrid relative seed size, that is, the hybrid seed diameter expressed as a percentage of the average seed diameter within the maternal population (see Table S1 and S8 for maternal averages). For both datasets, the mixed effect models include the random factors blossom identity nested within maternal plant identity, itself nested within maternal population identity, and paternal plant identity nested within paternal population identity. For the diallel data, the covariates included in the model, peduncle diameter (mm) and seed set (number of seeds per blossom), were centred on the mean of the maternal population. The units of the estimates are % for the intercept, and % change per unit change in the explanatory variables for the other estimates.

| <b>Dataset</b>              | <b>Parameter</b>               | <b>Estimate <math>\pm</math> SE</b> | <b><i>T</i></b> | <b><i>P</i></b> |
|-----------------------------|--------------------------------|-------------------------------------|-----------------|-----------------|
| 9 pops                      | Within populations (intercept) | 99.9 $\pm$ 0.42                     | 237.9           | <0.001          |
|                             | Between populations            | 0.45 $\pm$ 0.57                     | 0.79            | 0.43            |
| 4 pops                      | Within populations (intercept) | 100 $\pm$ 2.14                      | 46.7            | <0.001          |
|                             | Between populations            | 0.11 $\pm$ 0.30                     | 0.37            | 0.71            |
|                             | Peduncle                       | 2.84 $\pm$ 2.16                     | 1.31            | 0.19            |
|                             | Seed set                       | 0.29 $\pm$ 0.27                     | 1.06            | 0.29            |
|                             | Peduncle $\times$ matpop CC    | 4.29 $\pm$ 2.89                     | 1.49            | 0.14            |
|                             | Peduncle $\times$ matpop M     | 3.94 $\pm$ 2.65                     | 1.48            | 0.14            |
|                             | Peduncle $\times$ matpop PM    | - 5.16 $\pm$ 2.71                   | - 1.91          | 0.057           |
|                             | Seed set $\times$ matpop CC    | - 0.57 $\pm$ 0.33                   | - 1.71          | 0.088           |
|                             | Seed set $\times$ matpop M     | - 0.14 $\pm$ 0.33                   | - 0.43          | 0.67            |
|                             | Seed set $\times$ matpop PM    | - 0.49 $\pm$ 0.26                   | - 1.88          | 0.06            |
|                             | Seed set $\times$ patpop CC    | - 0.17 $\pm$ 0.29                   | - 0.58          | 0.56            |
|                             | Seed set $\times$ patpop M     | 0.15 $\pm$ 0.26                     | 0.58            | 0.56            |
| Seed set $\times$ patpop PM | - 0.15 $\pm$ 0.27              | - 0.54                              | 0.59            |                 |

**Table S6b.** Results of the second statistical test for the recognition-avoidance hypothesis in the two datasets (crosses among nine populations and diallel among four populations). Support for the recognition-avoidance hypothesis is given by the effect of the outcrossing rate of the paternal population (inferred from the anther-stigma distance (mm)) on hybrid relative seed size, that is, the hybrid seed diameter expressed as a percentage of the average seed diameter within the maternal population (see Table S1 and S8 for maternal averages). For both datasets, the mixed effect models include the random factors blossom identity nested within maternal plant identity, itself nested within maternal population identity, and paternal plant identity nested within paternal population identity. For the diallel data, the covariates included in the model, peduncle diameter (mm) and seed set (number of seeds per blossom), were centred on the mean of the maternal population. The units of the estimates are % for the intercept, and % change per unit change in the explanatory variables for the other estimates.

| <b>Dataset</b> | <b>Parameter</b>            | <b>Estimate <math>\pm</math> SE</b> | <b><i>T</i></b> | <b><i>P</i></b> |
|----------------|-----------------------------|-------------------------------------|-----------------|-----------------|
| 9 pops         | Intercept                   | 96.8 $\pm$ 1.91                     | 50.6            | <0.001          |
|                | Paternal pop. herkogamy     | 1.29 $\pm$ 0.66                     | 1.94            | 0.09            |
| 4 pops         | Intercept                   | 97.9 $\pm$ 1.48                     | 66.3            | <0.001          |
|                | Paternal pop. herkogamy     | 0.812 $\pm$ 0.49                    | 1.67            | 0.10            |
|                | Peduncle                    | 3.05 $\pm$ 2.45                     | 1.24            | 0.21            |
|                | Seed set                    | 0.526 $\pm$ 0.351                   | 1.50            | 0.14            |
|                | Peduncle $\times$ matpop CC | 5.25 $\pm$ 3.19                     | 1.65            | 0.10            |
|                | Peduncle $\times$ matpop M  | 3.86 $\pm$ 2.97                     | 1.30            | 0.20            |
|                | Peduncle $\times$ matpop PM | - 5.67 $\pm$ 3.02                   | - 1.88          | 0.061           |
|                | Seed set $\times$ matpop CC | - 0.744 $\pm$ 0.363                 | - 2.05          | 0.041           |
|                | Seed set $\times$ matpop M  | 0.136 $\pm$ 0.417                   | 0.33            | 0.74            |
|                | Seed set $\times$ matpop PM | - 0.584 $\pm$ 0.324                 | - 1.80          | 0.072           |
|                | Seed set $\times$ patpop CC | - 0.476 $\pm$ 0.324                 | - 1.47          | 0.14            |
|                | Seed set $\times$ patpop M  | 0.124 $\pm$ 0.297                   | 0.419           | 0.68            |
|                | Seed set $\times$ patpop PM | - 0.309 $\pm$ 0.395                 | - 0.782         | 0.44            |

**Table S7.** Results for the statistical test of a simple additive genetic effect on seed diameter in the two datasets. The support for this hypothesis is given by the parameter estimate for the effect of the parental relative seed size [ $\log_e(\text{average seed size of the paternal population}/\text{average seed size of the maternal population})$ ] on the hybrid relative seed size, that is, the hybrid seed diameter expressed as a percentage of the average seed diameter within the maternal population (see Table S1 and S8 for maternal averages). For both data sets, the mixed effect models included the random factors blossom identity nested within maternal plant identity, itself nested within maternal population identity, and paternal plant identity nested within paternal population identity. In the models analysing the data set from the diallel, the covariates, peduncle diameter (mm) and seed set (number of seeds per blossom), were centred on the mean of the maternal population. The units of the estimates are % for the intercept and % change per unit change in the explanatory variables for the other estimates.

| <b>Model</b> | <b>Parameter</b>            | <b>Estimate <math>\pm</math> SE</b> | <b><i>t</i></b> | <b><i>P</i></b> |
|--------------|-----------------------------|-------------------------------------|-----------------|-----------------|
| Additive     | Intercept                   | 100 $\pm$ 0.817                     | 122.4           | <0.001          |
| 9 pops       | Parental relative seed size | 10.37 $\pm$ 13.38                   | 0.775           | 0.454           |
| Additive     | Intercept                   | 100 $\pm$ 0.487                     | 205             | <0.001          |
| 4 pops       | Parental relative seed size | 3.34 $\pm$ 4.12                     | 0.81            | 0.42            |
|              | Peduncle                    | 2.73 $\pm$ 2.45                     | 1.12            | 0.27            |
|              | Seed set                    | 0.563 $\pm$ 0.351                   | 1.60            | 0.11            |
|              | Peduncle $\times$ matpop CC | 5.62 $\pm$ 3.19                     | 1.76            | 0.079           |
|              | Peduncle $\times$ matpop M  | 3.87 $\pm$ 2.98                     | 1.30            | 0.20            |
|              | Peduncle $\times$ matpop PM | - 5.30 $\pm$ 3.02                   | - 1.76          | 0.080           |
|              | Seed set $\times$ matpop CC | - 0.78 $\pm$ 0.36                   | - 2.15          | 0.033           |
|              | Seed set $\times$ matpop M  | 0.089 $\pm$ 0.42                    | 0.22            | 0.83            |
|              | Seed set $\times$ matpop PM | - 0.60 $\pm$ 0.32                   | - 1.86          | 0.064           |
|              | Seed set $\times$ patpop CC | - 0.50 $\pm$ 0.32                   | - 1.55          | 0.12            |
|              | Seed set $\times$ patpop M  | 0.11 $\pm$ 0.30                     | 0.36            | 0.72            |
|              | Seed set $\times$ patpop PM | - 0.33 $\pm$ 0.40                   | - 0.82          | 0.41            |

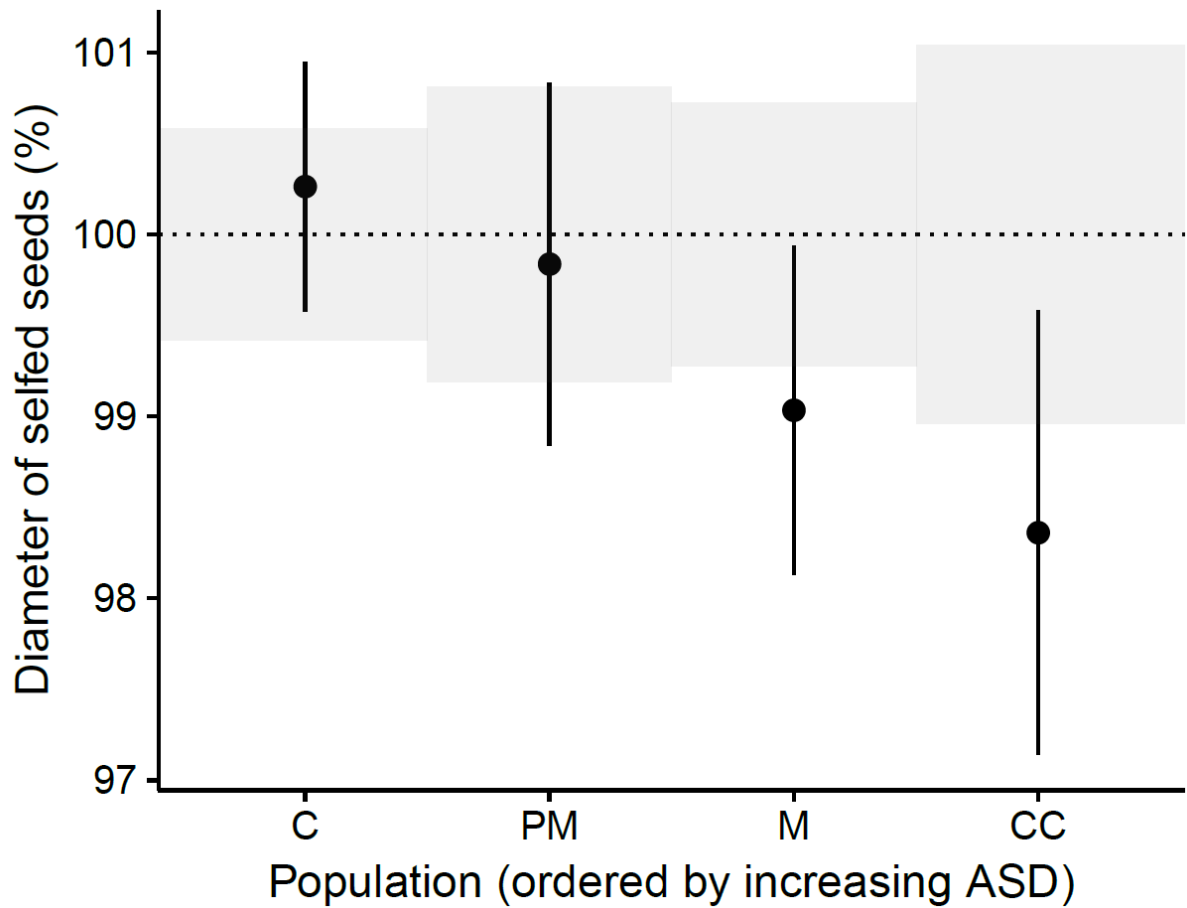

**Figure S1.** Effect of selfing on hybrid relative seed size (diameter of selfed seeds expressed as a percentage of the average seed diameter of outcrossed seeds within populations; dashed horizontal line) in the four populations of *D. scandens* used in the diallel crosses. Shaded areas represent the standard error in seed size for outcrossed seeds in each population. Means  $\pm$  SE for each cross combination were obtained from the linear mixed-effects models fitted for each maternal population (Table S8).



**Table S8.** Effect of paternal population (C, CC, M, PM) and selfing on seed diameter (mm) in four populations (Pop) of *D. scandens*. For each population, the average seed diameter of outcrossed seeds is given by the intercept of the model while the effects of selfing or paternal population in hybrid crosses are given as a contrast from the intercept. Covariates, peduncle diameter (mm) and seed set (number of seeds per blossom), were centred on the mean of the maternal population. In each model blossom identity nested within maternal plant identity, and paternal plant identity, were set as random factors. Note that although the effects of the covariates were not statistically significant in all populations, we included them in all the models in order to have similar models for all the populations.

| Pop | Parameter                 | Estimate $\pm$ SE  | Estimate $\pm$ SE  | <i>t</i> | <i>P</i> |
|-----|---------------------------|--------------------|--------------------|----------|----------|
| C   | C outcross (intercept)    | 3.893 $\pm$ 0.023  | 100 $\pm$ 0.582    | 171      | <0.001   |
|     | C self                    | 0.010 $\pm$ 0.031  | 0.263 $\pm$ 0.799  | 0.33     | 0.74     |
|     | PM                        | 0.030 $\pm$ 0.027  | 0.766 $\pm$ 0.690  | 1.11     | 0.27     |
|     | M                         | 0.036 $\pm$ 0.028  | 0.915 $\pm$ 0.710  | 1.29     | 0.20     |
|     | CC                        | 0.028 $\pm$ 0.028  | 0.711 $\pm$ 0.706  | 1.01     | 0.32     |
|     | Peduncle                  | 0.112 $\pm$ 0.063  | 2.867 $\pm$ 1.612  | 1.78     | 0.08     |
|     | Seed set                  | -0.019 $\pm$ 0.016 | -0.488 $\pm$ 0.410 | -1.19    | 0.24     |
|     | Seed set $\times$ C self  | 0.010 $\pm$ 0.020  | 0.250 $\pm$ 0.516  | 0.88     | 0.63     |
|     | Seed set $\times$ PM      | 0.028 $\pm$ 0.018  | 0.712 $\pm$ 0.563  | 1.54     | 0.13     |
|     | Seed set $\times$ M       | 0.052 $\pm$ 0.018  | 1.328 $\pm$ 0.466  | 2.85     | 0.01     |
|     | Seed set $\times$ CC      | 0.021 $\pm$ 0.024  | 0.549 $\pm$ 0.626  | 0.88     | 0.38     |
| PM  | PM outcross (intercept)   | 4.305 $\pm$ 0.035  | 100 $\pm$ 0.810    | 123      | <0.001   |
|     | PM self                   | -0.007 $\pm$ 0.039 | -0.163 $\pm$ 0.913 | -0.18    | 0.86     |
|     | C                         | 0.035 $\pm$ 0.032  | 0.823 $\pm$ 0.731  | 1.13     | 0.27     |
|     | M                         | 0.039 $\pm$ 0.031  | 0.905 $\pm$ 0.719  | 1.26     | 0.22     |
|     | CC                        | 0.044 $\pm$ 0.031  | 1.106 $\pm$ 0.708  | 1.44     | 0.16     |
|     | Peduncle                  | -0.098 $\pm$ 0.070 | -2.273 $\pm$ 1.626 | -1.40    | 0.17     |
|     | Seed set                  | -0.016 $\pm$ 0.013 | -0.366 $\pm$ 0.306 | -1.97    | 0.23     |
|     | Seed set $\times$ PM self | 0.011 $\pm$ 0.025  | 0.244 $\pm$ 0.574  | 0.43     | 0.67     |
|     | Seed set $\times$ C       | 0.013 $\pm$ 0.016  | 0.295 $\pm$ 0.366  | 0.81     | 0.423    |
|     | Seed set $\times$ M       | 0.027 $\pm$ 0.017  | 0.628 $\pm$ 0.389  | 1.62     | 0.11     |
|     | Seed set $\times$ CC      | -0.009 $\pm$ 0.017 | -0.220 $\pm$ 0.391 | -0.56    | 0.58     |
| M   | M outcross (intercept)    | 4.168 $\pm$ 0.030  | 100 $\pm$ 0.723    | 138      | <0.001   |
|     | M self                    | -0.040 $\pm$ 0.037 | -0.967 $\pm$ 0.875 | -1.11    | 0.27     |
|     | C                         | -0.010 $\pm$ 0.035 | -0.239 $\pm$ 0.850 | -0.28    | 0.78     |
|     | PM                        | 0.010 $\pm$ 0.033  | 0.233 $\pm$ 0.790  | 0.30     | 0.77     |
|     | CC                        | 0.072 $\pm$ 0.034  | 1.726 $\pm$ 0.810  | 2.13     | 0.04     |
|     | Peduncle                  | 0.375 $\pm$ 0.062  | 9.00 $\pm$ 1.478   | 6.09     | <0.001   |
|     | Seed set                  | -0.024 $\pm$ 0.019 | -0.578 $\pm$ 0.463 | -1.25    | 0.22     |
|     | Seed set $\times$ M self  | -0.077 $\pm$ 0.106 | -1.843 $\pm$ 2.550 | -0.72    | 0.47     |
|     | Seed set $\times$ C       | 0.132 $\pm$ 0.076  | 3.165 $\pm$ 1.823  | 1.74     | 0.09     |
|     | Seed set $\times$ PM      | 0.009 $\pm$ 0.044  | 0.214 $\pm$ 1.061  | 0.20     | 0.84     |
|     | Seed set $\times$ CC      | 0.038 $\pm$ 0.022  | 0.914 $\pm$ 0.538  | 1.70     | 0.09     |
| CC  | CC outcross (intercept)   | 4.134 $\pm$ 0.043  | 100 $\pm$ 1.039    | 96.3     | <0.001   |
|     | CC self                   | -0.068 $\pm$ 0.044 | -1.640 $\pm$ 1.061 | -1.55    | 0.13     |
|     | C                         | -0.059 $\pm$ 0.037 | -1.427 $\pm$ 0.888 | -1.61    | 0.12     |
|     | PM                        | -0.036 $\pm$ 0.036 | -0.863 $\pm$ 0.871 | -0.99    | 0.33     |
|     | M                         | -0.050 $\pm$ 0.036 | -1.210 $\pm$ 0.871 | -1.39    | 0.17     |
|     | Peduncle                  | 0.345 $\pm$ 0.091  | 8.336 $\pm$ 2.207  | 3.78     | <0.001   |
|     | Seed set                  | 0.028 $\pm$ 0.060  | 0.676 $\pm$ 1.459  | 0.46     | 0.64     |
|     | Seed set $\times$ CC self | -0.045 $\pm$ 0.066 | -1.097 $\pm$ 1.583 | -0.69    | 0.49     |
|     | Seed set $\times$ C       | -0.027 $\pm$ 0.064 | -0.654 $\pm$ 1.554 | -0.42    | 0.68     |
|     | Seed set $\times$ M       | -0.077 $\pm$ 0.065 | -1.830 $\pm$ 1.579 | -1.16    | 0.25     |
|     | Seed set $\times$ PM      | -0.022 $\pm$ 0.067 | -0.524 $\pm$ 1.613 | -0.33    | 0.75     |

### ***Incompatibility analysis of diallel crosses***

To assess possible incompatibilities between populations, we calculated the percentage of crosses that failed to produce seeds, and the percentage of aborted seeds for each cross combination (Table S9). Because each *D. scandens* blossom can produce a maximum of nine seeds, we subtracted the number of viable seeds from nine, to obtain the number of aborted seeds (non-developed and abnormally small seeds). Both the percentage of crosses that failed, and the percentage of aborted seeds were low for all cross combinations, and did not seem to differ between within-population and between-population crosses. Additionally, the average number of viable seeds produced per blossom was high for each cross combination, regardless of cross type (Table S9). These results suggest that there is no incompatibility issues between these populations. When we had replicated a cross between two individuals, we only included data from the first cross performed when assessing incompatibility. In the analyses on seed size, we included the crosses that produced the highest number of seeds.

**Table S9.** Percentage of crosses that failed to produce seeds, percentage of aborted/abnormal seeds and average number of viable seeds ( $\pm$  SE) produced per blossom in the first series of crosses performed among and within four populations of *D. scandens* ( $n = 480$  crosses).

| <b>Maternal population</b> | <b>Paternal population</b> | <b>Failed crosses (%)</b> | <b>Aborted/abnormal seeds (%)</b> | <b>Avg. number of viable seeds per blossom <math>\pm</math> SE</b> |
|----------------------------|----------------------------|---------------------------|-----------------------------------|--------------------------------------------------------------------|
| C                          | C outcross                 | 6                         | 17.4                              | 7.44 $\pm$ 0.47                                                    |
|                            | C self                     | 10                        | 13.6                              | 7.78 $\pm$ 0.28                                                    |
|                            | PM                         | 0                         | 10.7                              | 8.03 $\pm$ 0.31                                                    |
|                            | M                          | 3                         | 12.7                              | 7.86 $\pm$ 0.32                                                    |
|                            | CC                         | 1                         | 8.6                               | 8.22 $\pm$ 0.37                                                    |
| PM                         | PM outcross                | 5                         | 11.1                              | 8.00 $\pm$ 0.48                                                    |
|                            | PM self                    | 0                         | 8.9                               | 8.20 $\pm$ 0.51                                                    |
|                            | C                          | 0                         | 15.9                              | 7.57 $\pm$ 0.37                                                    |
|                            | M                          | 10                        | 13.2                              | 7.82 $\pm$ 0.43                                                    |
|                            | CC                         | 3                         | 11.1                              | 8.00 $\pm$ 0.31                                                    |
| M                          | M outcross                 | 0                         | 12.1                              | 8.35 $\pm$ 0.32                                                    |
|                            | M self                     | 10                        | 12.4                              | 8.89 $\pm$ 0.11                                                    |
|                            | C                          | 7                         | 1.33                              | 8.88 $\pm$ 0.07                                                    |
|                            | PM                         | 3                         | 3.1                               | 8.72 $\pm$ 0.10                                                    |
|                            | CC                         | 0                         | 8.8                               | 8.21 $\pm$ 0.35                                                    |
| CC                         | CC outcross                | 0                         | 4.4                               | 8.60 $\pm$ 0.17                                                    |
|                            | CC self                    | 0                         | 8.9                               | 8.20 $\pm$ 0.44                                                    |
|                            | C                          | 0                         | 8.7                               | 8.21 $\pm$ 0.23                                                    |
|                            | PM                         | 0                         | 4.8                               | 8.57 $\pm$ 0.16                                                    |
|                            | M                          | 0                         | 5.6                               | 8.50 $\pm$ 0.18                                                    |
